# Supplementary material
Source: HighWire-hosted journal article supplement (http://www.annfammed.org/highwire/filestream/8646/field_highwire_adjunct_files/0/Guetterman_Supp_Tables.pdf)
Supplement: Guetterman_Supp_Tables.pdf [file Guetterman_Supp_Tables.pdf]

Supplemental materials for:

Guetterman TC, Feters MD, Creswell JW. Integrating quantitative and qualitative results in health science mixed methods research through joint displays. *Ann Fam Med*. 2015;13(6):554-561.

This supplemental material has been supplied by the author and has not been edited by *Annals of Family Medicine*.

**Supplemental Table 1. Integration and Joint Displays Used in Explanatory Sequential, Exploratory Sequential, and Intervention Designs**

| <b>Authors</b>                           | <b>Purpose</b>                                                                                  | <b>Mixed Methods Rationale</b>                     | <b>Qualitative Data Sources</b>               | <b>Quantitative Data Sources</b>                           | <b>Integration</b> | <b>Analytic strategies</b> | <b>Joint Display</b>                                           |
|------------------------------------------|-------------------------------------------------------------------------------------------------|----------------------------------------------------|-----------------------------------------------|------------------------------------------------------------|--------------------|----------------------------|----------------------------------------------------------------|
| <b>Explanatory Sequential Designs</b>    |                                                                                                 |                                                    |                                               |                                                            |                    |                            |                                                                |
| *Finley et al <sup>1</sup>               | Develop/validate scale to assess staff and clinician relationships in PC                        | Triangulate                                        | Observations, interviews of clinicians, staff | Work Relationship Scale (WRS)                              | Connecting Merging | Joint display Narrative    | Table 4 relates quotes to WRS scores, theory                   |
| Zeng et al <sup>2</sup>                  | Investigate lived experiences of older persons with depression in Macau                         | Confirm or reject quan inferences, expand findings | In-depth interviews with older persons        | Scales - depression, mental status, social net., ADLs, QoL | Building Merging   | Joint display Narrative    | Table 3 maps qual categories to quan scales                    |
| Petros <sup>3</sup>                      | Investigate support needs of older persons caring for children with HIV/AIDS                    | Enrich results and capture nuances                 | Interviews of caregivers, government, and NGO | Survey caregivers on knowledge, caregiving, support        | Connecting Merging | Joint display Narrative    | Figure 1 maps findings to policy recommendations               |
| <b>Exploratory Sequential Designs</b>    |                                                                                                 |                                                    |                                               |                                                            |                    |                            |                                                                |
| *Haggerty et al <sup>4</sup>             | Develop/validate a generic measure of care management continuity                                | Multiple perspective                               | Meta-summary of themes of 33 qual studies     | Instrument - continuity of care                            | Building           | Joint display Narrative    | Table 2 relates qual to items                                  |
| Nutting et al <sup>5</sup>               | Examine barriers to guideline-concordant acute-phase care for individuals with major depression | Not specified                                      | Interviews of physicians and nurses           | A checklist of barriers to depression care                 | Building           | Joint display Narrative    | Table 2 arrays qual derived barriers and quan cluster analysis |
| <b>Mixed Methods Intervention Design</b> |                                                                                                 |                                                    |                                               |                                                            |                    |                            |                                                                |

This supplemental material has been supplied by the author and has not been edited by *Annals of Family Medicine*.

|                           |                                                                                                                        |                                                                  |                                                              |                                                                      |                    |                         |                                                                                    |
|---------------------------|------------------------------------------------------------------------------------------------------------------------|------------------------------------------------------------------|--------------------------------------------------------------|----------------------------------------------------------------------|--------------------|-------------------------|------------------------------------------------------------------------------------|
| *Shaw et al <sup>6</sup>  | Evaluate a primary care practice quality initiative to improve colorectal cancer screening rates                       | Richer understanding                                             | Observations, recording of RAP, learning collab., interviews | CRC screening rates based on medical record review                   | Merging            | Joint display Narrative | Table 5 arrays qual implementation practices by quan screening rate                |
| *Bradt et al <sup>7</sup> | Compare effects of music therapy versus music medicine interventions on psychological outcomes and pain in cancer care | Greater understanding, participant experience in their own words | Interviews with patients                                     | Visual analog and numeric ratings of mood, anxiety, relaxation, pain | Merging, embedding | Joint display Narrative | Table 4 organizes results by treatment-benefit types, align change and experiences |

#### Supplemental Table 1 References

1. Finley EP, Pugh JA, Lanham HJ, et al. Relationship quality and patient-assessed quality of care in VA primary care clinics: development and validation of the work relationships scale. *Ann Fam Med*. 2013;11(6):543-549.
2. Zeng W, North N, Kent B. Methodological Challenges to Research Among Chinese: Using Mixed Methods to Investigate Older Persons With Depression in Macau. *J Mixed Methods Res*. 2011;6(3):154-165.
3. Petros SG. Use of a mixed methods approach to investigate the support needs of older caregivers to family members affected by HIV and AIDS in South Africa. *J Mixed Methods Res*. 2012;6(4):275-293.
4. Haggerty JL, Roberge D, Freeman GK, Beaulieu C, Bréton M. Validation of a generic measure of continuity of care: when patients encounter several clinicians. *Ann Fam Med*. 2012;10(5):443-451.
5. Nutting PA, Rost K, Dickinson M, et al. Barriers to initiating depression treatment in primary care practice. *J Gen Intern Med*. 2002;17(2):103-111.
6. Shaw EK, Ohman-Strickland PA, Piasecki A, et al. Effects of facilitated team meetings and learning collaboratives on colorectal cancer screening rates in primary care practices: a cluster randomized trial. *Ann Fam Med*. 2013;11(3):220-228, S221-228.</unknown>
7. Bradt J, Potvin N, Kesslick A, et al. The impact of music therapy versus music medicine on psychological outcomes and pain in cancer patients: a mixed methods study. *Support Care Cancer*. 2015;23(5):1261-1271.

This supplemental material has been supplied by the author and has not been edited by *Annals of Family Medicine*.

**Supplemental Table 2. Integration and Joint Displays Used in Convergent Designs**

| <b>Authors</b>                   | <b>Purpose</b>                                                                                 | <b>Mixed Methods Rationale</b>                       | <b>Qualitative Data Sources</b>               | <b>Quantitative Data Sources</b>                 | <b>Integration</b> | <b>Analytic strategies</b> | <b>Joint Display</b>                              |
|----------------------------------|------------------------------------------------------------------------------------------------|------------------------------------------------------|-----------------------------------------------|--------------------------------------------------|--------------------|----------------------------|---------------------------------------------------|
| <b>Convergent Designs</b>        |                                                                                                |                                                      |                                               |                                                  |                    |                            |                                                   |
| Andrew et al (2008) <sup>1</sup> | Examine BSN student attrition and retention                                                    | Reasons for student responses                        | Open-ended survey items                       | Academic Persistence Scale-adapted for nurses    | Merging            | Joint display narrative    | Table 2, Table 3 array categorical data-by-themes |
| Devoe et al <sup>2</sup>         | Identify barriers of low-income parents to accessing health care for children                  | Capture experiences of families                      | Open-ended items of healthcare access survey  | Survey - health-related issues                   | Merging            | Joint display narrative    | Table 4 of demographic statistics by themes       |
| Wittink et al <sup>3</sup>       | Understand concordance and discordance between physicians and patients about depression status | Link themes to personal characteristics and measures | Semi-structured interviews with patients      | CES-D, Beck Anxiety Inventory, Physician Rating  | Merging            | Joint display Narrative    | Table 3 of statistics-by-themes                   |
| Panda et al <sup>4</sup>         | Examine discrimination, HIV stigma in West Bengal                                              | Complementarity, different perspective               | Interviews on discrimination; focus groups    | Surveys-stigma                                   | Merging            | Joint display Narrative    | Table 5 qual quan side-by-side                    |
| *Dickson et al <sup>5</sup>      | Explore knowledge and cognitive function influence on heart failure self-care                  | Complementarity, explain                             | Interviews of individuals providing self-care | Scales-knowledge, psychomotor, memory, self-care | Merging            | Joint display Narrative    | Table 3 cross case (qual and quan) by domain      |
| Kennett et al <sup>6</sup>       | Understand how resourcefulness is                                                              | Understand complex and                               | Interviews about self-management              | Self-Control Schedule -                          | Merging            | Joint display              | Table 3 arrays levels of SCS                      |

This supplemental material has been supplied by the author and has not been edited by *Annals of Family Medicine*.

|                                                            |                                                                                      |                                                       |                                                                        |                                                |                    |                         |                                                            |
|------------------------------------------------------------|--------------------------------------------------------------------------------------|-------------------------------------------------------|------------------------------------------------------------------------|------------------------------------------------|--------------------|-------------------------|------------------------------------------------------------|
|                                                            | reflected in self-management of pain among program clients                           | dynamic topic                                         | of pain                                                                | learned resourcefulness                        |                    | Narrative               | by themes/quotes                                           |
| Andrew et al (2011) <sup>7</sup>                           | Understand patients' satisfaction ratings and practice implications                  | Completeness                                          | Brief patient interviews; two open-ended items                         | PQS-7 - satisfaction                           | Merging            | Joint display Narrative | Table 2 arrays PQS-7 tertiles by themes/quotes             |
| Pluye et al <sup>8</sup>                                   | Describe family physicians' information use and estimate NNBI for knowledge resource | Systematic, comprehensive case description            | Observation, log reports, archives, interviews of physicians           | IAM questionnaire                              | Connecting Merging | Joint display Narrative | Figure 4-clinical vignettes and path diagram               |
| Meurer et al <sup>9</sup>                                  | Explore how to best use adaptive clinical trial designs                              | Understand beliefs and concerns too                   | Open text response to survey, mini-focus groups                        | Visual Analog Scale (VAS) scores               | Merging            | Joint display Narrative | Figure 1 arrays VAS scores with text responses using color |
| <b>Convergent Designs with Data Transformation Variant</b> |                                                                                      |                                                       |                                                                        |                                                |                    |                         |                                                            |
| Freund et al <sup>10</sup>                                 | Explore complex causality of hospitalizations for ACSCs                              | Not specified                                         | Interviews of physicians; case audits                                  | Data trans. descriptive analysis               | Embedding          | Narrative, data trans.  | Table 2 displays data transformation                       |
| Scott et al <sup>11</sup>                                  | "Characterize and compare communication patterns in primary care practices"          | Capture quantitative aspects of relationship patterns | Interviews, observations of staff, clinicians, participants; documents | Social network adjacency matrix                | Merging            | Data trans.             | Figure 2 network diagram quantized for analysis            |
| Tarn et al <sup>12</sup>                                   | Test intervention to improve physician-patient communication about new meds          | Qualitative added actual visit content                | Transcripts of patient visits                                          | Survey - communication, trust, health literacy | Merging            | Data trans.             | Table 4 of data transformation                             |

This supplemental material has been supplied by the author and has not been edited by *Annals of Family Medicine*.

## Supplemental Table 2 References

1. Andrew S, Salamonson Y, Halcomb EJ. Integrating mixed methods data analysis using NVivo: An example examining attrition and persistence of nursing students. *International Journal of Multiple Research Approaches*. 2008;2(1):36-43.
2. Devoe JE, Baez A, Angier H, Krois L, Edlund C, Carney PA. Insurance + access not equal to health care: typology of barriers to health care access for low-income families. *Ann Fam Med*. 2007;5(6):511-518
3. Wittink MN, Barg FK, Gallo JJ. Unwritten rules of talking to doctors about depression: integrating qualitative and quantitative methods. *Ann Fam Med*. 2006;4(4):302-309.
4. Panda S, Das RS, Maruf SKA, Pahari S. Exploring Stigma in Low HIV Prevalence Settings in Rural West Bengal, India: Identification of Intervention Considerations [published online ahead of print May 27, 2014]. *J Mixed Methods Res*. doi: 10.1177/1558689814535843
5. Dickson VV, Lee CS, Riegel B. How do cognitive function and knowledge affect heart failure self-care? *J Mixed Methods Res*. 2011;5(2):167-189.
6. Kennett DJ, O'Hagan FT, Cezer D. Learned resourcefulness and the long-term benefits of a chronic pain management program. *J Mixed Methods Res*. 2008;2(4):317-339.
7. Andrew S, Salamonson Y, Everett B, Halcomb E, Davidson PM. Beyond the ceiling effect: Using a mixed methods approach to measure patient satisfaction. *International Journal of Multiple Research Approaches*. 2011;5(1):52-63.
8. Pluye P, Grad RM, Johnson-Lafleur J, et al. Number needed to benefit from information (NNBI): proposal from a mixed methods research study with practicing family physicians. *Ann Fam Med*. 2013;11(6):559-567.
9. Legocki LJ, Meurer WJ, Frederiksen S, et al. Clinical trialist perspectives on the ethics of adaptive clinical trials: a mixed-methods analysis. *BMC Med Ethics*. 2015;16(1):27.
10. Freund T, Campbell SM, Geissler S, et al. Strategies for reducing potentially avoidable hospitalizations for ambulatory care-sensitive conditions. *Ann Fam Med*. 2013;11(4):363-370.
11. Scott J, Tallia A, Crosson JC, et al. Social network analysis as an analytic tool for interaction patterns in primary care practices. *Ann Fam Med*. 2005;3(5):443-448.
12. Tarn DM, Paterniti DA, Orosz DK, Tseng C-H, Wenger NS. Intervention to enhance communication about newly prescribed medications. *Ann Fam Med*. 2013;11(1):28-36.
